# Supplementary material for: The ‘Maltreatment and Abuse Chronology of Exposure’ (MACE) Scale for the Retrospective Assessment of Abuse and Neglect During Development
Source: PLoS One. 2015 Feb 25;10(2):e0117423. doi: 10.1371/journal.pone.0117423 (PMC4340880; doi:10.1371/journal.pone.0117423)
Supplement: S4 File — (XLSX) [file pone.0117423.s013.xlsx]

## Sheet: Entry_sheet
Username	Age	Swore	Hurtful	Afraid	Leave	Closet	Pushed	Hit	Hit_med	Spank_buttocks	Spanked_bare	Spanked_strap	Sex_comment	Fondled	Touch_them	Push_sib	Hit_sib_med	Sex_comment_sib	Fondled_sib	o_fondled	o_intercourse	Adults_push_m	Adults_hit_m	Adults_hit_med_m	Adults_push_f	Adults_hit_f	peer_swore	Peer_hurtful	Peer_Rumors	Peer_Excluded	Peer_afraid	Peer_threat_money	Peer_forced	Peer_pushed	Peer_hit	Peer_hit_med	Peer_forced_sex	Peer_sex_not_want	M_unavail_poor	F_unavail_poor	P_diff_please	P_no_time	R_P_loved_you	R_P_special	R_P_protect	R_P_ER	No_food	Dirty_clothes	Adult_resposibility
RB00008	19	1	1	1	0	0	1	0	0	0	0	0	1	0	0	0	0	0	0	0	0	0	0	0	0	0	0	0	0	0	0	0	0	0	0	0	0	0	0	0	1	1	1	1	1	1	0	0	1
RB00014	19	0	0	0	1	0	0	0	0	0	0	0	0	0	0	0	0	0	0	1	0	0	0	0	0	0	1	1	1	1	0	0	0	1	1	0	0	0	1	0	1	0	1	1	1	1	0	0	1
RB00015	18	0	0	0	1	0	1	0	0	1	0	0	0	0	0	1	0	0	0	0	0	0	0	0	1	0	1	1	1	1	1	0	1	1	0	0	0	0	0	0	1	0	1	1	1	1	0	0	0
RB00021	19	1	1	1	1	0	1	1	0	1	0	1	0	0	0	1	1	0	0	0	0	1	0	0	1	1	1	1	0	1	1	1	1	1	1	0	1	0	1	1	1	1	1	1	1	1	1	1	1
RB00023	19	1	1	1	1	0	1	1	0	1	1	0	0	0	0	0	0	0	0	0	0	1	1	0	0	0	1	1	0	0	0	0	0	1	1	1	0	0	1	1	1	1	1	1	1	1	1	1	1
RB00024	19	0	0	0	0	0	0	0	0	0	0	0	0	0	0	0	0	0	0	0	0	0	0	0	0	0	1	1	0	1	0	0	0	0	0	0	0	0	0	0	1	0	1	1	1	1	0	0	0
RB00029	19	1	0	0	0	0	1	0	0	1	1	0	0	0	0	0	0	0	0	0	0	0	0	0	0	0	1	1	1	1	1	0	1	1	1	0	0	0	1	1	1	1	1	1	1	1	0	0	1
RB00035	18	1	1	0	1	0	1	0	0	1	0	1	0	0	0	0	0	0	0	0	0	0	0	0	0	0	1	1	1	0	1	0	0	0	0	0	0	0	1	1	1	1	1	1	1	1	0	0	0
RB00042	19	0	1	0	0	0	0	0	0	0	0	0	0	0	0	0	0	0	0	0	0	0	0	0	0	0	0	1	0	0	0	0	0	0	0	0	0	0	0	1	1	0	1	1	1	1	0	0	1
[truncated: 4 more columns]

## Sheet: correction_sheet
Username	Age	Swore_Childhood	Hurtful_Childhood	Afraid_Childhood	Leave_Childhood	Closet_Childhood	Pushed_Childhood	Hit_Childhood	Hit_med_Childhood	Spank_buttocks_Childhood	Spanked_bare_Childhood	Spanked_strap_Childhood	Sex_comment_Childhood	Fondled_Childhood	Touch_them_Childhood	Push_sib_Childhood	Hit_sib_med_Childhood	Sex_comment_sib_Childhood	Fondled_sib_Childhood	o_fondled_Childhood	o_intercourse_Childhood	Adults_push_m_Childhood	Adults_hit_m_Childhood	Adults_hit_med_m_Childhood	Adults_push_f_Childhood	Adults_hit_f_Childhood	peer_swore_Childhood	Peer_hurtful_Childhood	Peer_Rumors_Childhood	Peer_Excluded_Childhood	Peer_afraid_Childhood	Peer_threat_money_Childhood	Peer_forced_Childhood	Peer_pushed_Childhood	Peer_hit_Childhood	Peer_hit_med_Childhood	Peer_forced_sex_Childhood	Peer_sex_not_want_Childhood	M_unavail_poor_Childhood	F_unavail_poor_Childhood	P_diff_please_Childhood	P_no_time_Childhood	R_P_loved_you_Childhood	R_P_special_Childhood	R_P_protect_Childhood	R_P_ER_Childhood	No_food_Childhood	Dirty_clothes_Childhood	Adult_resposibility_Childhood
RB00008	19	1	1	1	0	0	1	0	0	0	0	0	1	0	0	0	0	0	0	0	0	0	0	0	0	0	0	0	0	0	0	0	0	0	0	0	0	0	0	0	1	1	0	0	0	0	0	0	1
RB00014	19	0	0	0	1	0	0	0	0	0	0	0	0	0	0	0	0	0	0	1	0	0	0	0	0	0	1	1	1	1	0	0	0	1	1	0	0	0	1	0	1	0	0	0	0	0	0	0	1
RB00015	18	0	0	0	1	0	1	0	0	1	0	0	0	0	0	1	0	0	0	0	0	0	0	0	1	0	1	1	1	1	1	0	1	1	0	0	0	0	0	0	1	0	0	0	0	0	0	0	0
RB00021	19	1	1	1	1	0	1	1	0	1	0	1	0	0	0	1	1	0	0	0	0	1	0	0	1	1	1	1	0	1	1	1	1	1	1	0	1	0	1	1	1	1	0	0	0	0	1	1	1
RB00023	19	1	1	1	1	0	1	1	0	1	1	0	0	0	0	0	0	0	0	0	0	1	1	0	0	0	1	1	0	0	0	0	0	1	1	1	0	0	1	1	1	1	0	0	0	0	1	1	1
RB00024	19	0	0	0	0	0	0	0	0	0	0	0	0	0	0	0	0	0	0	0	0	0	0	0	0	0	1	1	0	1	0	0	0	0	0	0	0	0	0	0	1	0	0	0	0	0	0	0	0
RB00029	19	1	0	0	0	0	1	0	0	1	1	0	0	0	0	0	0	0	0	0	0	0	0	0	0	0	1	1	1	1	1	0	1	1	1	0	0	0	1	1	1	1	0	0	0	0	0	0	1
RB00035	18	1	1	0	1	0	1	0	0	1	0	1	0	0	0	0	0	0	0	0	0	0	0	0	0	0	1	1	1	0	1	0	0	0	0	0	0	0	1	1	1	1	0	0	0	0	0	0	0
RB00042	19	0	1	0	0	0	0	0	0	0	0	0	0	0	0	0	0	0	0	0	0	0	0	0	0	0	0	1	0	0	0	0	0	0	0	0	0	0	0	1	1	0	0	0	0	0	0	0	1
[truncated: 9 more columns]

## Sheet: Scored_sheet
Username	Age	MACE_SexAb_SUM	MACE_PVA_SUM	MACE_NVEA_SUM	MACE_PPhysM_SUM	MACE_IPV_SUM	MACE_WSibA_SUM	MACE_PeerVA_SUM	MACE_PeerPhys_SUM	MACE_EN_SUM	MACE_PN_SUM	MACE_MULT_EVER	MACE_SUM_EVER	MACE_SexAb_MULTI	MACE_PVA_MULTI	MACE_NVEA_MULTI	MACE_PPhysM_MULTI	MACE_IPV_MULTI	MACE_WSibA_MULTI	MACE_PeerVA_MULTI	MACE_PeerPhys_MULTI	MACE_EN_MULTI	MACE_PN_MULTI	Intrafamilial_MAES
RB00008	19	2	8	8	2	0	0	0	0	2	2	2	24	0	1	1	0	0	0	0	0	0	0	2
RB00014	19	2	3	4	0	0	0	8	4	2	0	2	23	0	0	0	0	0	0	1	1	0	0	0
RB00015	18	0	3	4	4	2	3	10	4	0	0	3	30	0	0	0	0	0	1	1	1	0	0	1
RB00021	19	2	10	8	6	6	5	8	8	4	4	9	61	0	1	1	1	1	1	1	1	1	1	7
RB00023	19	0	10	8	6	4	0	4	6	4	4	7	46	0	1	1	1	1	0	0	1	1	1	6
RB00024	19	0	0	2	0	0	0	6	0	0	0	0	8	0	0	0	0	0	0	0	0	0	0	0
RB00029	19	0	3	6	5	0	0	10	6	4	0	4	34	0	0	1	0	0	0	1	1	1	0	2
RB00035	18	0	8	4	5	0	0	8	0	4	0	3	29	0	1	0	0	0	0	1	0	1	0	2
RB00042	19	0	3	3	0	0	0	2	0	2	0	0	10	0	0	0	0	0	0	0	0	0	0	0

## Sheet: Reference_sheet
Familial and Non-Familial Sexual Abuse (9 items)	# Items endorsed	# Latent Exposure	Scaled Score	Cutoff	0		MACE_SexAb	MACE_PVA	MACE_NVEA	MACE_PPhysM	MACE_IPV	MACE_WSibA	MACE_PeerVA	MACE_PeerPhys	MACE_EN	MACE_PN
Item	0		0		10		4	8	6	6	4	3	8	4	4	4
parent sex comment	1		2
parents_fondled	2		4	2	4
parents_had_u_touch	3		5			rev
adults_fondled	4		6
adults_have_sex	5		7
peer forced	6		9
peer sex not wanted	7		10
Parental Verbal Abuse (4 items)	# Items endorsed	# Latent Exposure	Scaled Score	Cutoff
Item	0	0	0
parents_name	1	1	3
parents_hurtful	2	2	5			ROC
parents_afraid	3	3	8	3	8
parents_threatened	4	4	10
							MACE_SexAb_EVER	4
							MACE_PVA_EVER	4.5
Parental Non-Verbal Abuse (5 items)	# Items endorsed	# Latent Exposure	Scaled Score	Cutoff			MACE_NVEA_EVER	3.53
Item	0		0				MACE_PPhysM_EVER	7.31
parents_closet	1		2				MACE_IPV_EVER	3.81
parent_diff_please	2		3			ROC	MACE_WSibA_EVER	2.063
parent_no_time	3		4				MACE_PeerVA_EVER	9
shoulder_adult	4		6	4	6		MACE_PeerPhys_EVER	3.788
financial_pressure	5		8				MACE_P_loss_EVER	3
family_secrets	6		10				MACE_EN_EVER	3.06
							MACE_PN_EVER	1.9
Parental Physical Maltreatment (6 items)	# Items endorsed	# Latent Exposure	Scaled Score	Cutoff
Item	0		0
parents_pushed	1		2
parents_hit	2		4
parents_intent_harm	3		5
parents_spanked_open	4		6	4	6
parents_buttocks	5		8			rev
parents_spank_object	6		10
Witnessing Physical Abuse between parents (5 items)	# Items endorsed	# Latent Exposure	Scaled Score	Cutoff
Item	0		0
saw_adults_push_mother	1		2
saw_adults_hit_mother	2		4	2	4	rev
saw_adults_harm_mother	3		6
saw_adults_push_father	4		8
saw_adults_hit_father	5		10
Witnessing Abuse toward sibling (5 items)	# Items endorsed	# Latent Exposure	Scaled Score	Cutoff
Item	0		0
p_pushed_sibs	1		3	1	3	ROC
p_sibs_intent_harm	2		5
p_sibs_sex_comment	3		8
p_sibs_fondle	4		10
Peer Verbal Abuse+ Ostracism (4 items)	# Items endorsed	# Latent Exposure	Scaled Score	Cutoff
Item	0		0
peer_swore_a	1		2
peer_hurtful_a	2		4
peer_rumors_a	3		6
peer_exclude_a	4		8	4	8	ROC
peer_afraid_a	5		10
Peer Physical bullying (5 items)	# Items endorsed	# Latent Exposure	Scaled Score	Cutoff
Item	0		0
peer_threat_money_a	1		2
peer_force_you_a	2		4	2	4	rev
peer_pushed_a	3		6
peer_hit_a	4		8
peer_harm_a	5		10
Emotional Neglect	# Items endorsed	# Latent Exposure	Scaled Score	Cutoff
Item	0		0
mother_unavail_neg	1		2
father_unavail_neg	2		4	2	4
parent_feel_loved	3		6			rev
parent_feel_special	4		8
family_strength	5		10
Physical Neglect	# Items endorsed	# Latent Exposure	Scaled Score	Cutoff
Item	0		0
parent_protect	1		2			ROC
parent_ER_doctor	2		4	2	4
family_not_enough_eat	3		6
family_dirty_clothes	4		8
looked out_each_other	5		10
			Familial and Non-Familial Sexual Abuse (9 items)	0	1.84064	3.57167	4.86193	6.05875	7.35546	8.67773	10
			Parental Verbal Abuse (4 items)	0	2.5	5	7.5	10
			Parental Non-Verbal Abuse (5 items)	0	1.57204	3.07318	4.30017	5.66888	7.74695	10
			Parental Physical Maltreatment (6 items)	0	1.9735	3.80611	5.07762	6.34284	8.1091	10
			Witnessing Physical Abuse between parents (5 items)	0	2.16266	4.24163	6.04359	7.99291	10
			Witnessing Abuse toward sibling (6 items)	0	2.5	5	7.5	10
			Peer Verbal Abuse+ Ostracism (4 items)	0	2.01492	3.9439	5.65182	7.76456	10
			Peer Physical bullying (5 items)	0	2.31611	4.49115	6.18181	8.05096	10
			Emotional Neglect	0	2.06605	4.06369	5.86281	7.89386	10
			Physical Neglect	0	2.16341	4.21562	5.92172	7.9115	10
